# Supplementary material for: Age and Task Modulate Olfactory Sensitivity in the Florida Carpenter Ant Camponotus floridanus
Source: Insects. 2023 Aug 23;14(9):724. doi: 10.3390/insects14090724 (PMC10532128; doi:10.3390/insects14090724)
Supplement: Supplementary file 1 [file insects-14-00724-s001.zip › insects-2537344-File 1.xlsx]

## Sheet: Sheet1
Chemical Class	Compound	CAS Number	Blend
Alcohols	2,6-dimethyoxyethane	6638-05-7	1
	3-pentyn-1-ol	10229-10-4	1
	cis-3-nonen-1-ol	10340-23-5	1
	cinnamyl alcohol (trans)	104-54-1	1
	2-ethyl-1-hexanol	104-76-7	1
	alpha-terpineol	10482-56-1	1
	4-methoxybenzyl alcohol	105-13-5	1
	2,4-dimethylphenol	105-67-9	1
	citronellol	106-22-9	1
	geraniol	106-24-1	1
	p-cresol	106-44-5	1
	linalool (racemic)	78-70-6	1
	(-)-linalool	126-91-0	1
	1,2,6-hexanetriol	106-69-4	2
	3,5-dimethylphenol	108-68-9	2
	1-heptanol	111-70-6	2
	2-phenyl-1-propanol	1123-85-9	2
	1-undecanol	112-42-5	2
	1-dodecanol	112-53-8	2
	2-methyl-3-buten-2-ol	115-18-4	2
	4-ethylphenol	123-07-9	2
	9-decen-1-ol	13019-22-2	2
	1-nonanol	143-08-8	2
	4-methyl-3-heptanol (both isomers)	14979-39-6	2
	cedrol	77-53-2	2
	1,3-dimethoxybenzene	151-10-0	3
	(+/-) geosmin	16423-19-1	3
	2,6-diisopropylphenol	2078-54-8	3
	3-methyl-2-cyclohexen-1-ol	21378-21-2	3
	(S)-1-octen-3-ol	24587-53-9	3
	farnesol	4602-84-0	3
	1-hexen-3-ol	4798-44-1	3
	1-hepten-3-ol	4938-52-7	3
	isophytol	505-32-8	3
	1,1-dimetyhoxyethane	534-15-6	3
	3-methyl-2-buten-1-ol	556-82-1	3
	2,6-dimethylphenol	576-26-1	4
	(+/-) 4-methylcyclohexanol	589-91-3	4
	3-octanol	589-98-0	4
	3-hexanol	623-37-0	4
	2-nonanol	628-99-9	4
	2-n-propylphenol	644-35-9	4
	3-methyl-3-buten-1-ol	763-32-6	4
	isopulegol	7786-67-6	4
	2-isopropylphenol	88-69-7	4
	(+/-) decahydro-2-naphthol	825-51-4	4
	DL-menthol	89-78-1	4
	2-phenylphenol	90-43-7	4
	cis-2-hexen-1-ol	928-94-9	5
	trans-2-hexen-1-ol	928-95-0	5
	cis-3-hexen-1-ol	928-96-1	5
	trans-3-hexen-1-ol	928-97-2	5
	o-cresol	95-48-7	5
	3,4-dimethylphenol	95-65-8	5
	2,5-dimethylphenol	95-87-4	5
	4-tert-butylphenol	98-54-4	5
	isopropylphenol	25168-06-3	5
	2-phenoxyethanol	122-99-6	5
	eugenol	97-53-0	5
	linalool oxide	60047-17-8	5
	2,3-dimethylphenol	526-75-0	6
	1-pentanol	71-41-0	6
	phenethyl alcohol	60-12-8	6
	1-octen-3-ol	3391-86-4	6
	2-phenylethanol	60-12-8	6
	1-octanol	111-87-5	6
	2-ethylphenol	90-00-6	6
	3-methyl-1-butanol	123-51-3	6
	isoeugenol	97-54-1	6
	hexyl alcohol	111-27-3	6
	4-methylcyclohexanol	589-91-3	6
	1-dodecanol	112-53-8	6
Aldehydes	trans,trans-2,4-heptadienal	4313-03-5	7
	alpha-methylcinnamaldehyde	101-39-3	7
	3-phenylpropionaldehyde	104-53-0	7
	acetal	105-57-7	7
	3,4-dimethoxylbenzaldehyde	120-14-9	7
	4-isopropylbenzaldehyde	122-03-2	7
	p-anisaldehyde	123-11-5	7
	propionaldehyde	123-38-6	7
	3,5-dimethoxy-4-hydroxybenzaldehyde	134-96-3	7
	o-anisaldehyde	135-02-4	7
	2,4-dimethylbenzaldehyde	15764-16-6	8
	trans-2-pentenal	1576-87-0	8
	L(-)-perillaldehyde	18031-40-8	8
	4-propylbenzaldehyde	28785-06-0	8
	4-ethylbenzaldehyde	4748-78-1	8
	Indole-3-carboxyaldehyde	487-89-8	8
	trans-2-methyl-2-butenal	497-03-0	8
	citral	5392-40-5	8
	hexanal	66-25-1	8
	trans-2-hexenal	6728-26-3	8
	DL-2-phenyl-propionaldehyde	93-53-8	9
	decanal	112-31-2	9
	4-chlorobenzaldehyde	104-88-1	9
	phenylacetaldehyde	122-78-1	9
	propionaldehyde	123-38-6	9
	pelargonaldehyde (nonanal)	124-19-6	9
	benzaldehyde	100-52-7	9
	octanal	124-13-0	9
	heptanal	111-71-7	9
	citral	5392-40-5	9
Alkanes	beta-bromostyrene (cis/trans)	103-64-0	10
	n-undecane	1120-21-4	10
	alpha p-dimethylstyrene	1195-32-0	10
	Z-9-tricosene	27519-02-4	10
	1-chlorohexane	544-10-5	10
	2-ethyltoluene	611-14-3	10
	1-methylnaphthalene	90-12-0	10
	gamma-terpinene	99-85-4	10
	gamma-terpinene	99-85-4	10
	2-methylnapthalene (beta)	91-57-6	10
	decane	124-18-5	10
	heptane	142-82-5	10
	pentadecane	629-62-9	10
	dichloromethane	75-09-2	10
	1-methylnaphthalene (alpha)	90-12-0	10
	α-pinene	80-56-8	10
	(R)-(+)-limonene	5989-27-5	10
Amines	4-butylaniline	104-13-2	11
	5-ethyl-2-methylpyridine	104-90-5	11
	2-acetylpyrrole	1072-83-9	11
	isoamylamine	107-85-7	11
	2,6-lutidine	108-48-5	11
	2,6-dimethylpyrazine	108-50-9	11
	2-methylpyrazine	109-08-0	11
	3-pyrroline	109-96-6	11
	pentylamine	110-58-7	11
	heptylamine	111-68-2	11
	4-acetylpyridine	1122-54-9	11
	2-acetylpyridine	1122-62-9	12
	isoquinoline	119-65-3	12
	triethylamine	121-44-8	12
	2,5-dimethylpyrazine	123-32-0	12
	pyrrolidine	123-75-1	12
	spermidine	124-20-9	12
	ethylpyrazine	13925-00-3	12
	cadaverine dihydrochloride	1476-39-7	12
	2-ethyl-3-methylpyrazine	15707-23-0	12
	2,3-diethylpyrazine	15707-24-1	12
	cinnamonitrile	1885-38-7	12
	pyrazine	290-37-9	13
	5,6,7,8-tetrahydroquinoline	34413-35-9	13
	3-acetylpyridine	350-03-8	13
	cadaverine	462-94-2	13
	lepidine	491-35-0	13
	N-methylpiperidine	626-67-5	13
	1,2,3,4-tetrahydroquinoline	635-46-1	13
	spermine	71-44-3	13
	2-methylquinoxaline	7251-61-8	13
	quinoline	91-22-5	13
	N-methylpyrrole	96-54-8	13
	cyclohexylamine	108-91-8	13
	2-methylpiperidine	109-05-7	13
	butylamine	109-73-9	14
	pyrrole	109-97-7	14
	1,4-diaminobutane	110-60-1	14
	pyridine	110-86-1	14
	2-acetylpyridine	1122-62-9	14
	ammonium hydroxide (ammonia 28-30%)	1336-21-6	14
	3-methylpiperidine	626-56-2	14
	4-methylpiperidine	626-58-4	14
	phenethylamine	64-04-0	14
	cis-2,6-domethylpiperidine	766-17-6	14
	2-chloroaniline	95-51-2	14
	amylamine	110-58-7	14
Carboxylic Acids	phenylacetic acid	103-82-2	15
	DL-3-methylvaleric acid	105-43-1	15
	butyric acid	107-92-6	15
	valeric acid	109-52-4	15
	undecanoic acid	112-37-8	15
	undecylenic acid	112-38-9	15
	oleic acid	112-80-1	15
	2-methylheptanoic acid	1188-02-9	15
	adipic acid	124-04-9	15
	octanoic acid	124-07-2	15
	trans-cinnamic acid	140-10-3	15
	lauric acid	143-07-7	16
	2-methyl-4-pentenoic acid	1575-74-2	16
	trans-2-methyl-2-pentenoic acid	16957-70-3	16
	2-oxovaleric acid	1821-02-9	16
	2-methylhexanoic acid	4536-23-6	16
	hydrocinnamic acid	504-52-0	16
	4-pentenoic acid	591-80-0	16
	2-oxobutyric acid	600-18-0	16
	4-methylvaleric acid	646-07-1	16
	L(+) lactic acid	79-33-4	16
	2-ethylbutryic acid	88-09-5	16
	2-furoic acid	88-14-2	17
	2-methylvaleric acid	97-61-0	17
	cyclohexane carboxylic acid	98-89-5	17
	myristic acid	544-63-8	17
	pyruvic acid	127-17-3	17
	L(+)-lactic acid	79-33-4	17
	butyric acid	107-92-6	17
	n-valeric acid	109-52-4	17
	isovaleric acid	503-74-2	17
	2-oxobutyric acid	600-18-0	17
	decanoic acid	334-48-5	17
	nonanoic acid	112-05-0	17
	lauric acid	143-07-7	18
	sodium salicylate	54-21-7	18
	ethyl butyrate	105-54-4	18
	methyl hexanoate	106-70-7	18
	heptanoic acid	111-14-8	18
	octanoic acid	124-07-2	18
	tridecanoic acid	539-53-9	18
	palmitic acid	57-10-3	18
	isobutyric acid	79-31-2	18
	methyl-2-methyl benzoate	89-71-4	18
	methyl benzoate	93-58-3	18
	hexanoic acid	142-62-1	18
Esters	methyl cinnamate	103-26-4	19
	benzyl butyrate	103-37-7	19
	benzyl cinnamate	103-41-3	19
	cinnamyl acetate	103-54-8	19
	3-phenylpropyl isobutyrate	103-58-2	19
	diethyl malonate	105-53-3	19
	geranyl acetate	105-87-3	19
	isoamyl butyrate	106-27-4	19
	ethyl heptanoate	106-30-9	19
	dimethyl succinate	106-65-0	19
	ethyl isovalerate	108-64-5	19
	butyl butyrate	109-21-7	20
	diethyl sebacate	110-40-7	20
	propyl formate	110-74-7	20
	methyl caprylate	111-11-5	20
	octyl acetate	112-14-1	20
	n-decyl acetate	112-17-4	20
	phenylsalicylate	118-55-8	20
	benzyl salicylate	118-58-1	20
	ethyl salicylate	118-61-6	20
	dihydrocoumarin	119-84-6	20
	benzyl benzoate	120-51-4	20
	linalyl acetate	115-95-7	20
	ethyl-3-phenylglycidate	121-39-1	21
	sucrose octaacetate	126-14-7	21
	dimethyl phthalate	131-11-3	21
	benzyl acetate	140-11-4	21
	ethyl acrylate	140-88-5	21
	diethyl maleate	141-05-9	21
	methyl nonanoate	1731-84-6	21
	methyl 3-hexenoate (predominately trans)	2396-78-3	21
	ethylbutyrylacetate	3249-68-1	21
	methylvanillate	3943-74-6	21
	furaneol acetate	4166-20-5	21
	methyl cyclohexane carboxylate	4630-82-4	22
	ethyl valerate	539-82-2	22
	ethyl levulinate	539-88-8	22
	methyl isobutyrate	547-63-7	22
	methyl propionate	554-12-1	22
	ethyl tiglate	5837-78-5	22
	n-butylpropionate	590-01-2	22
	cyclohexylacetate	622-45-7	22
	methyl tiglate	6622-76-0	22
	ethyl 2-methylbutyrate	7452-79-1	22
	triethyl citrate	77-93-0	23
	diethyl phthalate	84-66-2	23
	ethyl o-aminobenzoate	87-25-2	23
	coumarin	91-64-5	23
	6-methylcoumarin	92-48-8	23
	isoeugenyl acetate	93-29-8	23
	methyl nicotinate	93-60-7	23
	ethyl benzoylacetate	94-02-0	23
	isobutyl isobutyrate	97-85-8	23
	isobutyl acetate	110-19-0	23
	alpha-terpinyl acetate	80-26-2	23
	methyl n-methylanthranilate	85-91-6	23
	ethyl caproate	123-66-0	24
	ethyl propionate	105-37-3	24
	ethyl 3-hydroxybutyrate	5405-41-4	24
	ethyl formate	109-94-4	24
	isoamyl acetate	123-92-2	24
	phenethylacetate	103-45-7	24
	methyl caprylate	111-11-5	24
	ethyl 2-furoate	614-99-3	24
	amyl acetates	628-63-7	24
	methyl salicylate	119-36-8	24
	octyl acetate	112-14-1	24
	dodecyl acetate	112-66-3	24
	anisole	100-66-3	25
	4-methylanisole	104-93-8	25
	benzaldehyde dimethyl acetal	1125-88-8	25
	4-allylanisole	140-67-0	25
	1,4-dimethoxybenzene	150-78-7	25
	trans-anethole	4180-23-8	25
	cineole	470-82-6	25
	2-methylfuran	534-22-5	25
	2-methyl anisole	578-58-5	25
	veratrole	91-16-7	25
	2-methyoxynaphthalene	93-04-9	25
	1,2-dimetoxy-4-(2-propenyl)-benzene	93-15-2	25
	styrene oxide	96-09-3	25
Ketones and Indoles	indole	120-72-9	26
	3-methylindole	83-34-1	26
	4'-methyoxyacetophenone	100-06-1	26
	1,3-diphenylacetone	102-04-5	26
	4-(4-methoxyphenyl)-2-butanone	104-20-1	26
	3-acetyl-2,5-dimethylfuran	10599-70-9	26
	3-octanone	106-68-3	26
	cyclohexanone	108-94-1	26
	6-methyl-5-hepten-2-one	110-93-0	26
	2-octanone	111-13-7	26
	2,6,6-trimethyl-2-cyclohexen-1,4-dione	1125-21-9	27
	3',4'-dimethoxyacetophenone	1131-62-0	27
	3-hydroxy-2-methyl-4-pyrone	118-71-8	27
	2'-hydroxyacetophenone	118-93-4	27
	2-acetyl-5-methylfuran	1193-79-9	27
	4'-methylacetophenone	122-00-9	27
	4-methoxyphenylacetone	122-84-9	27
	4-heptanone	123-19-3	27
	alpha-ionone	127-41-3	27
	N,N-diethyl-m-toluamide	134-62-3	27
	ethyl vinyl ketone	1629-58-9	28
	2-acetylcyclopentanone	1670-46-8	28
	4-hexen-3-one	2497-21-4	28
	2-methyltetrahydrofuran-3-one	3188-00-9	28
	geranylacetone	3796-70-1	28
	(+)-fenchone	4695-62-9	28
	cis-jasmone	488-10-8	28
	n-butyrophenone	495-40-9	28
	2'-aminoacetophenone	551-93-9	28
	3-methylcyclohexanone	591-24-2	28
	L(-)-carvone	6485-40-1	29
	DL-camphor	76-22-2	29
	isophorone	78-59-1	29
	2-nonanone	821-55-6	29
	2',4'-dimethylacetophenone	89-74-7	29
	pulegone	89-82-7	29
	3-nonanone	925-78-0	29
	3-pentanone	96-22-0	29
	3-octanone	106-68-3	29
	2-heptanone	110-43-0	29
	2-octanone	111-13-7	30
	2-butanone	78-93-3	30
	alpha-ionone	127-41-3	30
	DEET	134-62-3	30
	(+)-carvone	2244-16-8	30
	2,3-butanedione	431-03-8	30
	acetovanillone	498-02-2	30
	2-decanone	693-54-9	30
	benzophone	119-61-9	30
	geranyl acetone	3796-70-1	30
	6-methyl-5-hepten-2-one	110-93-0	30
Lactones	epsilon-caprolactone	502-44-3	31
	gamma-dodecalactone	2305-05-7	31
	gamma-octalactone	104-50-7	31
	gamma-nonalactone	104-61-0	31
	gamma-undecalactone	104-67-6	31
	gamma-heptalactone	105-21-5	31
	gamma-valerolactone	108-29-2	31
	gamma-hexalactone	695-06-7	31
	gamma-decanolactone	706-14-9	31
	delta-undecalactone	710-04-3	32
	delta-decalactone	705-86-2	32
	delta-dodecalactone	713-95-1	32
	delta-hexalactone	823-22-3	32
	R(+) delta-decanolactone	705-86-2	32
	delta-octanolactone	698-76-0	32
	delta-tetradecanolactone	2721-22-4	32
	delta-tridecanolactone	7370-92-5	32
	epsilon-decanolactone	5579-78-2	32
	delta-nonanolactone	3301-94-8	32
	(S)(-) delta-decanolactone	705-86-2	32
	epsilon-dodecanolactone	16429-21-3	32
Sulfurs	phenylethyl isothiocyanate	2257-09-2	33
	alpha-toluene thiol	100-53-8	33
	thiophenol	108-98-5	33
	1-butanethiol	109-79-5	33
	thiophene	110-02-1	33
	1-pentanethiol	110-66-7	33
	1-hexanethiol	111-31-9	33
	1,6-hexanedithiol	1191-43-1	33
	methyl 3-(methylthio)propionate	13532-18-8	33
	difurfurylsulfide	13678-67-6	33
	bis(methylthio)methane	1618-26-4	33
	2-methyl-1-butanethiol	1878-18-8	33
	S-methylthiobutanoate	2432-51-1	34
	isopropyl disulfide	4253-89-8	34
	3-(methylthio)-1-hexanol	51755-66-9	34
	2-(methylthio)ethanol	5271-38-5	34
	3-methyl-1-butanediol	541-31-1	34
	n-butyl sulfide	544-40-1	34
	allyl isothiocyanate	57-06-7	34
	benzyl isothiocyanate	622-78-6	34
	propyl disulfide	629-19-6	34
	2,5-dimethylthiophene	638-02-8	34
	methylsulfide	75-18-3	34
	furfuryl mercaptan	98-02-2	34
Thiazoles	4-methylthiazole	693-95-8	35
	2,4,5-trimethylthiazole	13623-11-5	35
	2-isopropyl-4-methylthiazole	15679-13-7	35
	2-ethoxythiazole	15679-19-3	35
	2-isobutylthiazole	18640-74-9	35
	2-methyl-2-thiazoline	2346-00-1	35
	2-acetylthiazole	24295-03-2	35
	thiazole	288-47-1	35
	4,5-dimethylthiazole	3581-91-7	35
	4-methyl-4-thiazolylethylacetate	656-53-1	36
	4-methylthiazole	693-95-8	36
	benzothiazole	95-16-9	36
	ethanethiol	75-08-1	36
	2,4,5-trimethylthiazole	13623-11-5	36
	benzyl cyanide	140-29-4	36
	2,4-dimethylthiazole	541-58-2	36
	methyl disulfide	624-92-0	36
	2-acetylthiophene	88-15-3	36
